# Supplementary material for: Stakeholder’s perspectives of postnatal discharge: a qualitative evidence synthesis
Source: PubMed Central journal article supplement (PMC10414110; doi:10.1136/bmjgh-2023-011766), 2023-08-08
Supplement: bmjgh-2023-011766supp001.pdf [file bmjgh-2023-011766supp001.pdf]

**Supplementary file 1. Example search strategy for PubMed/MEDLINE (adapted for other databases)**

| Search string | Content                                                                                                                                                                                                                                                |
|---------------|--------------------------------------------------------------------------------------------------------------------------------------------------------------------------------------------------------------------------------------------------------|
| #1            | Woman [mh] OR mother [mh] OR maternal [mh] OR patient [mh]                                                                                                                                                                                             |
| #2            | Infant [mh] OR new-born [mh] OR [baby]                                                                                                                                                                                                                 |
| #3            | Caregiver OR family [mh] OR partner [mh] OR husband [mh] OR parent [mh]                                                                                                                                                                                |
| #4            | Midwife [mh] OR nurse [mh] OR health care worker [mh] OR health care professional [mh] OR health worker [mh] OR health care provider [mh] OR physician [mh] OR paediatrician [mh] OR obstetrician [mh]                                                 |
| #5            | #1 OR #2 OR #3 OR #4                                                                                                                                                                                                                                   |
| #6            | Discharge preparation [tiab] OR discharge readiness [tiab] OR readiness for discharge [tiab] OR discharge process [tiab] OR discharge OR discharge transition [tiab] OR discharge plan [tiab] OR hospital discharge [tiab] OR patient discharge [tiab] |
| #7            | Postnatal [mh] OR postpartum [mh] OR after birth [tw] OR intrapartum [mh] OR childbirth [mh] OR maternity [mh] OR neonatal [mh]                                                                                                                        |
| #8            | #6 AND #6 AND #7                                                                                                                                                                                                                                       |
| #9            | Publication year limit 2000-2020                                                                                                                                                                                                                       |
