# Supplementary material for: Stakeholder’s perspectives of postnatal discharge: a qualitative evidence synthesis
Source: PubMed Central journal article supplement (PMC10414110; doi:10.1136/bmjgh-2023-011766), 2023-08-08
Supplement: bmjgh-2023-011766supp002.pdf [file bmjgh-2023-011766supp002.pdf]

**Supplementary file 2. GRADE-CERQual assessment of confidence in the findings**

| Studies contributing data                                   | Synthesis/review finding                              | Methodological limitations | Coherence                 | Adequacy          | Relevance                 | Certainty of evidence | Rationale                                                                                                                                      |
|-------------------------------------------------------------|-------------------------------------------------------|----------------------------|---------------------------|-------------------|---------------------------|-----------------------|------------------------------------------------------------------------------------------------------------------------------------------------|
| Dol (2019); George (2005); Haith-Cooper (2018)              | Rushed discharge process                              | Minor concerns             | Moderate concerns         | Serious concerns  | Moderate concerns         | Low                   | Downgraded two levels for serious concerns with adequacy, moderate concerns with relevance and coherence, and minor concerns with limitations. |
| Dol (2019); Persson (2002); Kanotra (2007); Svensson (2018) | Diversification of teaching methods needed            | Minor concerns             | Moderate concerns         | Moderate concerns | No or very minor concerns | Moderate              | Downgraded one level for moderate concerns with coherence and adequacy and minor concerns with limitations.                                    |
| Dol (2019); Haith-Cooper (2018)                             | Need for standardized and comprehensive procedures    | Minor concerns             | No or very minor concerns | Serious concerns  | No or very minor concerns | Moderate              | Downgraded one level for moderate concerns with adequacy and minor concerns with limitations.                                                  |
| Dol (2019); George (2005); Kanotra (2007); Svensson (2018)  | Care for the woman is often overlooked                | Moderate concerns          | No or very minor concerns | Moderate concerns | No or very minor concerns | Moderate              | Downgraded one level for moderate concerns with adequacy and moderate concerns with limitations.                                               |
| Dol (2019)                                                  | Need for midwife training on postnatal care education | Minor concerns             | No or very minor concerns | Serious concerns  | No or very minor concerns | Moderate              | Downgraded for serious concerns with adequacy and minor concerns with limitations.                                                             |
| Dol (2019); Persson (2002); Kanotra                         | Importance of involving fathers/other family members  | Minor concerns             | No or very minor concerns | Moderate concerns | No or very minor concerns | Moderate              | Downgraded one level for moderate concerns with adequacy and minor concerns with limitations.                                                  |

|                                                                                    |                                                                          |                      |                              |                      |                                 |                 |                                                                                                           |
|------------------------------------------------------------------------------------|--------------------------------------------------------------------------|----------------------|------------------------------|----------------------|---------------------------------|-----------------|-----------------------------------------------------------------------------------------------------------|
| (2007);<br>Svensson<br>(2018)                                                      |                                                                          |                      |                              |                      |                                 |                 |                                                                                                           |
| Dol (2019);<br>George (2005)                                                       | Assumed maternal<br>knowledge                                            | Moderate<br>concerns | No or very minor<br>concerns | Serious<br>concerns  | No or very<br>minor<br>concerns | <b>Low</b>      | Downgraded two levels for<br>serious concerns with adequacy<br>and moderate concerns with<br>limitations. |
| Dol (2019);<br>Haith-Cooper<br>(2018);<br>Kanotra<br>(2007);<br>Svensson<br>(2018) | Socioeconomic,<br>cultural and<br>language barriers                      | Minor concerns       | No or very minor<br>concerns | Moderate<br>concerns | No or very<br>minor<br>concerns | <b>Moderate</b> | Downgraded one level for<br>moderate concerns with<br>adequacy and minor concerns<br>with limitations.    |
| Persson<br>(2002);<br>Kanotra<br>(2007);<br>Svensson<br>(2018)                     | Importance of<br>women/parent<br>involvement in the<br>discharge process | Minor concerns       | No or very minor<br>concerns | Serious<br>concerns  | No or very<br>minor<br>concerns | <b>Moderate</b> | Downgraded one level for<br>serious concerns with adequacy<br>and minor concerns with<br>limitations.     |
